# Supplementary material for: An overview of outdoor low-cost gas-phase air quality sensor deployments: current efforts, trends, and limitations
Source: Copernicus journal article supplement (doi:10.5194/egusphere-2024-1004), 2024-04-08
Supplement: Supplementary file 1 [file egusphere-2024-1004-supplement.pdf]

# An overview of outdoor low-cost gas-phase air quality sensor deployments: current efforts, trends, and limitations

Kristen Okorn<sup>1,2,3</sup>, Laura T. Iraci<sup>1</sup>

<sup>1</sup>Atmospheric Science Branch, NASA Ames Research Center, Moffett Field, CA, 94035, USA

<sup>2</sup>NASA Postdoctoral Program, Oak Ridge Associated Universities, Oak Ridge, TN, 37830, USA

<sup>3</sup>now at Bay Area Environmental Research Institute, Moffett Field, CA, 94035, USA

*Correspondence to:* Kristen Okorn (kristen.e.okorn@nasa.gov)

**Table S1:** Quasi-Permanent Sensor Networks Reviewed and Selected Characteristics

| Sensor Network           | Organization Type                  | Affiliation                                                                  | Location         | Pollutants                                                                       | Calibration Method(s)                              |
|--------------------------|------------------------------------|------------------------------------------------------------------------------|------------------|----------------------------------------------------------------------------------|----------------------------------------------------|
| BEACO2N                  | Research Institution or University | The University of California, Berkeley                                       | USA, UK, Oceania | CO <sub>2</sub> , CO, NO <sub>2</sub> , O <sub>3</sub> , PM                      | co-location with reference instrument              |
| AirU                     | Company born out of university     | TELLUS (born out of Univ. Utah NSF grant)                                    | USA              | CO, NO <sub>2</sub> , PM                                                         | co-location with reference instrument, lab/chamber |
| Ribbit                   | Non-profit                         | Ribbit Network 501(c) non-profit                                             | USA, UK, Europe  | CO <sub>2</sub>                                                                  | co-location with reference instrument              |
| MKE Fresh Air Collective | Non-profit                         | MKE Fresh Air Collective                                                     | USA              | VOC, O <sub>3</sub> , PM                                                         | defer to sensor manufacturer                       |
| Love my Air Denver       | Government                         | Denver Department of Public Health & Environment                             | USA              | PM, O <sub>3</sub> , CO, NO, NO <sub>2</sub> , H <sub>2</sub> S, SO <sub>2</sub> | co-location with reference instrument              |
| Love my Air Wisconsin    | Non-profit                         | Children's Health Alliance of Wisconsin                                      | USA              | PM                                                                               | not reported                                       |
| Clarity                  | Company                            | Clarity Movement Co.                                                         | global           | NO <sub>2</sub> , O <sub>3</sub> , PM                                            | co-location with reference instrument              |
| PurpleAir                | Company                            | PurpleAir, Inc.                                                              | global           | PM, VOC                                                                          | varies by end user                                 |
| AirNow                   | Government                         | US Environmental Protection Agency                                           | USA              | O <sub>3</sub> , PM                                                              | defer to sensor manufacturer                       |
| AirVisual Outdoor        | Company                            | IQAir                                                                        | global           | PM, CO <sub>2</sub>                                                              | not reported                                       |
| RIVM Measuring Together  | Government                         | Dutch National Institute for Public Health and the Environment               | Netherlands      | PM, NO <sub>2</sub> , NH <sub>3</sub>                                            | co-location with reference instrument              |
| SMARTCITIZEN             | Company born out of university     | Smart Citizen (born out of Institute for Advanced Architecture of Catalonia) | global           | CO <sub>2</sub> , VOC, PM                                                        | co-location with reference instrument              |

**Table S2: Campaign Sensor Networks Reviewed and Selected Characteristics**

| Sensor Network                                    | Organization Type                           | Location                                   | Pollutants                         | Calibration Method(s)                                  |
|---------------------------------------------------|---------------------------------------------|--------------------------------------------|------------------------------------|--------------------------------------------------------|
| Y-Pods                                            | Research Institution or University          | USA, Mongolia                              | CO2, CO, CH4, NO2, O3              | co-location with reference instrument                  |
| INSTEP                                            | Research Institution or University          | USA                                        | CO2, CO, CH4, HCHO, NO2, O3        | co-location with reference instrument                  |
| MODULAIR                                          | Company                                     | global                                     | CO, CO2, NO, NO2, O3, PM           | co-location with reference instrument                  |
| Kunak Air                                         | Company                                     | Ethiopia, Germany, India, Belgium, Spain   | SO2, NO, NO2, O3, CO, PM           | co-location with reference instrument                  |
| Ellona WT1                                        | Company                                     | France, Canada, Estonia, Italy             | VOC, H2S, NH3, NO2, CO2, CH4, PM   | varies by end user                                     |
| SNAQ boxes                                        | Research Institution or University          | UK, Nigeria, China, Portugal               | CO, NO, NO2, CO2, VOC, PM          | co-location with reference instrument                  |
| AQMesh                                            | Company                                     | UK, Portugal, Nicaragua                    | NO, NO2, O3, CO                    | co-location with reference instrument                  |
| Envirowatch E-MOTES                               | Research Institution or University          | UK                                         | CO, NO, NO2                        | co-location with reference instrument                  |
| MAS (mini air system)                             | Research Institution or University          | China                                      | CO, NO2, PM                        | co-location with reference instrument                  |
| Trafficsensnet project                            | Research Institution or University          | Czech Republic                             | CO, NO2, SO2, VOC, PM              | co-location with reference instrument                  |
| KOALA                                             | Research Institution or University          | Australia, China, Sri Lanka, Vietnam, Fiji | PM, CO                             | co-location with reference instrument                  |
| ekoNET                                            | Company                                     | Serbia                                     | CO, CO2, NO, NO2, O3, PM           | co-location with reference instrument                  |
| RAMP (Real-time Affordable Multi-Pollutant)       | Research Institution or University          | USA, Puerto Rico, Africa, Canada           | CO, CO2, NO2, O3                   | co-location with reference instrument                  |
| RES-NOVAE                                         | Government                                  | Italy                                      | CO, CO2, NO2, O3, SO2, PM          | co-location with reference instrument                  |
| AirQino                                           | Research Institution or University          | Italy                                      | CO, CO2, NO2                       | co-location with reference instrument                  |
| Village Green Project                             | Government                                  | USA                                        | PM, O3, NO2, VOC                   | co-location with reference instrument                  |
| CO in Nigeria                                     | Research Institution or University          | Nigeria                                    | CO                                 | not reported                                           |
| Nairobi Sensors                                   | Research Institution or University          | Nairobi                                    | PM, NO, NO2, SO2                   | defer to sensor manufacturer                           |
| ARISense                                          | Research Institution or University, Company | Malawi, USA                                | CO, NO, NO2, O3, PM                | co-location with reference instrument                  |
| SNUCO2M                                           | Research Institution or University          | South Korea                                | CO2                                | co-location with reference instrument                  |
| CarboSense                                        | Research Institution or University          | Switzerland                                | CO2                                | co-location with reference instrument                  |
| Israel CanarIT                                    | Research Institution or University          | Israel                                     | O3, NO2, VOC, PM                   | co-location with reference instrument                  |
| VIEW (Volunteer Internet-based Environment Watch) | Research Institution or University          | Pakistan                                   | O3, CO, SO2                        | not reported                                           |
| O3 in New Zealand                                 | Research Institution or University          | New Zealand, Canada                        | O3                                 | co-location with reference instrument                  |
| CAPTOR Box                                        | Research Institution or University          | Spain, Italy, Austria                      | CO, CO2, O3, NO, NO2               | co-location with reference instrument                  |
| Beijing Sensors                                   | Research Institution or University          | China                                      | O3, CO, NO2, SO2                   | co-location with reference instrument                  |
| NO2 in Tokyo                                      | Research Institution or University          | Japan                                      | NO2                                | lab calibration                                        |
| Beijing Sensors (2)                               | Research Institution or University          | China                                      | O3, NO, NO2, CO2, PM               | co-location with reference instrument                  |
| CO in Taiwan                                      | Research Institution or University          | Taiwan                                     | CO                                 | co-location with reference instrument                  |
| MPAQs (MultiPollutant Air Quality Sensor)         | Research Institution or University          | India                                      | SO2, NO2, O3, CO, PM               | co-location with reference instrument                  |
| India IoT Sensors                                 | Research Institution or University          | India                                      | CO, PM                             | not specified                                          |
| SATVAM                                            | Research Institution or University          | India                                      | O3, NO2                            | co-location with reference instrument                  |
| Prana Air                                         | Company                                     | India                                      | CO, CO2, SO2, NO2, O3, H2S, PM     | not reported                                           |
| Oizum                                             | Company                                     | India, France                              | PM, CO, VOC, CO2                   | not reported, varies by end user                       |
| CO in Brazil                                      | Research Institution or University          | Brazil                                     | CO                                 | lab calibration                                        |
| VOCs in Argentina                                 | Research Institution or University          | Argentina                                  | VOC                                | not specified                                          |
| Peru Sensors                                      | Research Institution or University          | Peru                                       | CO, NO2, SO2, H2S, O3, PM, CO2, O2 | co-location with reference instrument                  |
| Bettair                                           | Company                                     | Spain                                      | CO, CO2, NO, NO2, O3, SO2, H2S, PM | co-location with reference instrument                  |
| Airly                                             | Company                                     | global                                     | CO, NO2, O3, PM, SO2               | lab calibration, co-location with reference instrument |
| NASUS                                             | Government                                  | Italy                                      | NO2, CO, SO2, H2S                  | lab calibration, co-location with reference instrument |
| ECN Airbox                                        | Research Institution or University          | Portugal                                   | NO2, PM, O3                        | co-location with reference instrument                  |
| PAS                                               | Research Institution or University          | China                                      | NO, NO2, O3                        | co-location with reference instrument                  |
| CairBox                                           | Company                                     | France                                     | H2S, CH3SH                         | co-location with reference instrument                  |
| Cuba Sensors                                      | Research Institution or University          | Cuba                                       | NO2, SO2, O3, CO, PM               | lab calibration, co-location with reference instrument |
| Nigeria Sensors                                   | Research Institution or University          | Nigeria                                    | NO, NO2, CO, CO2, O3, PM           | defer to sensor manufacturer                           |
| Morocco IoT Sensors                               | Research Institution or University          | Morocco                                    | CO2, NO2                           | not specified                                          |
| Ecuador IoT Sensors                               | Research Institution or University          | Ecuador                                    | CO, CO2, PM                        | not specified                                          |
| MGMS (Multi-gas monitoring stations)              | Research Institution or University          | Qatar                                      | O3, NO2, H2S, CO, SO2, NO, PM      | not specified                                          |
